# Supplementary material for: Radiosensitivity index emerges as a potential biomarker for combined radiotherapy and immunotherapy
Source: PubMed Central journal article supplement (PMC8172905; doi:10.1038/s41525-021-00200-0), 2021-06-02
Supplement: 41525_2021_200_MOESM1_ESM.pdf [file 41525_2021_200_MOESM1_ESM.pdf]

# Supplementary Figures and Tables

**Radiosensitivity index emerges as a potential biomarker for combined radiotherapy and immunotherapy**

Yang-Hong Dai, Ying-Fu Wang, Po-Chien Shen, Cheng-Hsiang Lo, Jen-Fu Yang, Chu-Shu Lin, Hsing-Lung Chao and Wen-Yen Huang

# Supplementary Figure 1

**a**

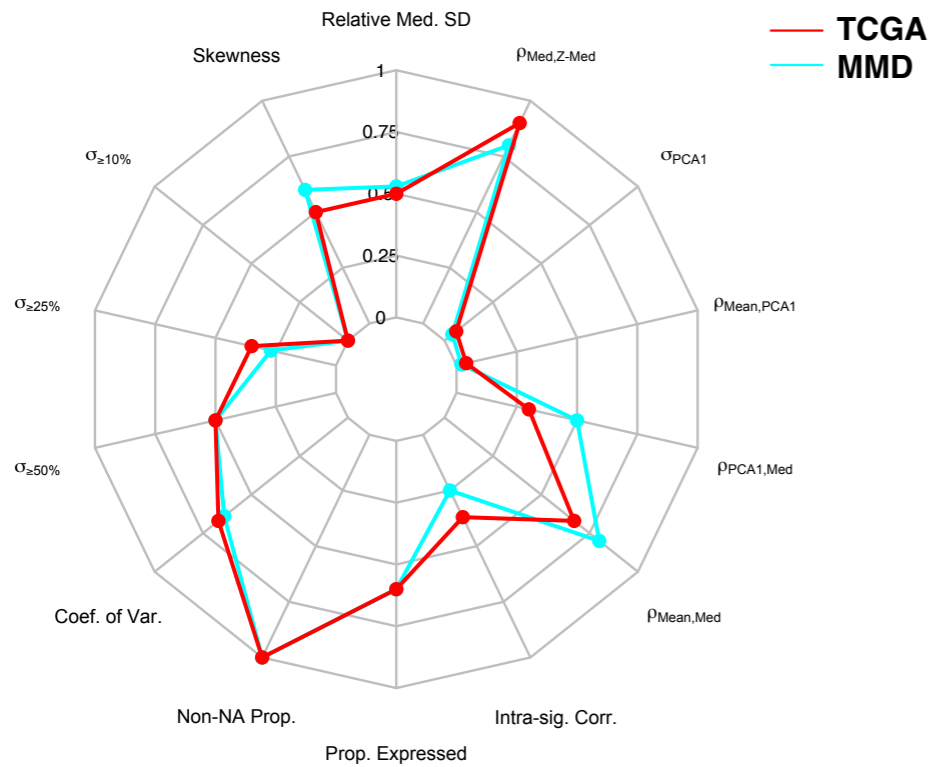

**b**

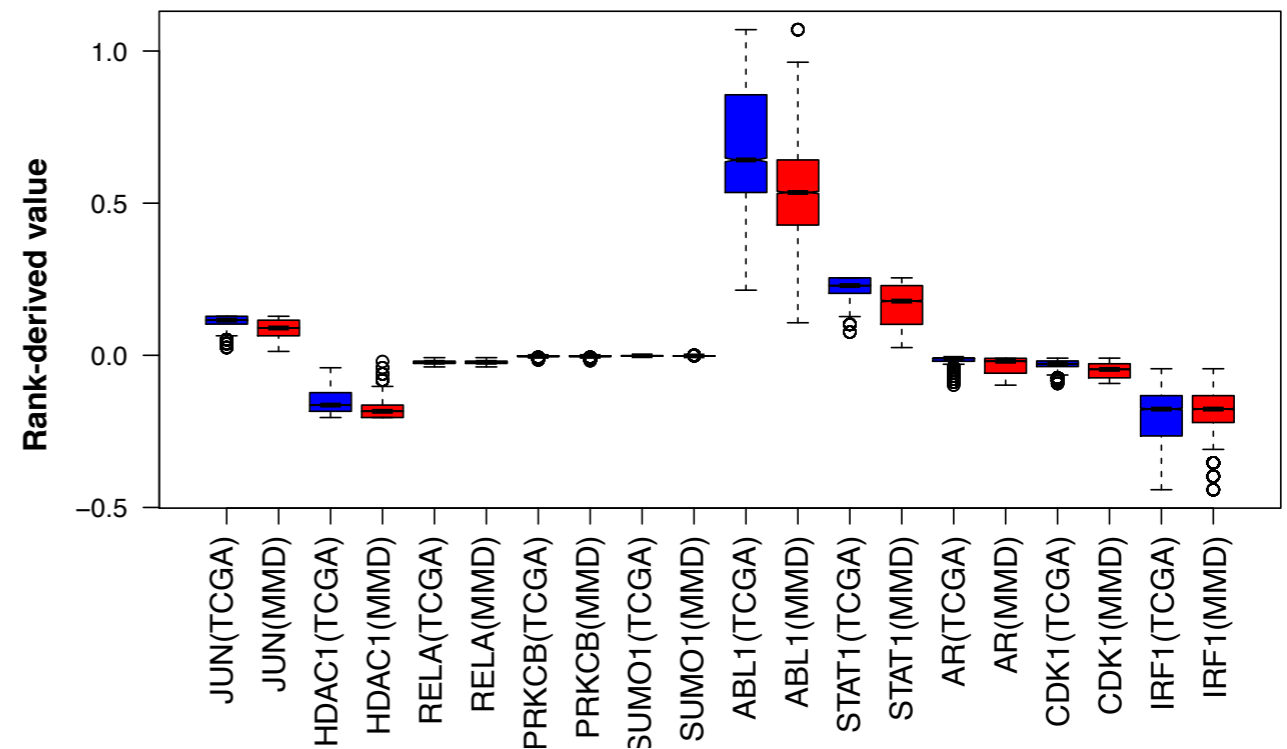

**Supplementary Figure 1: Signature quality control in TCGA and MMD.**

**a** Radar plot produced from sigQC. Each ray of the radar plot represents one of the summary metrics for RSI as a gene

signature. **b** Distribution of each rank-transformed RSI genes in TCGA and MMD. The box hinges represent the 1st and 3rd quartiles, while the middle black horizontal lines indicate the median.

# Supplementary Figure 2

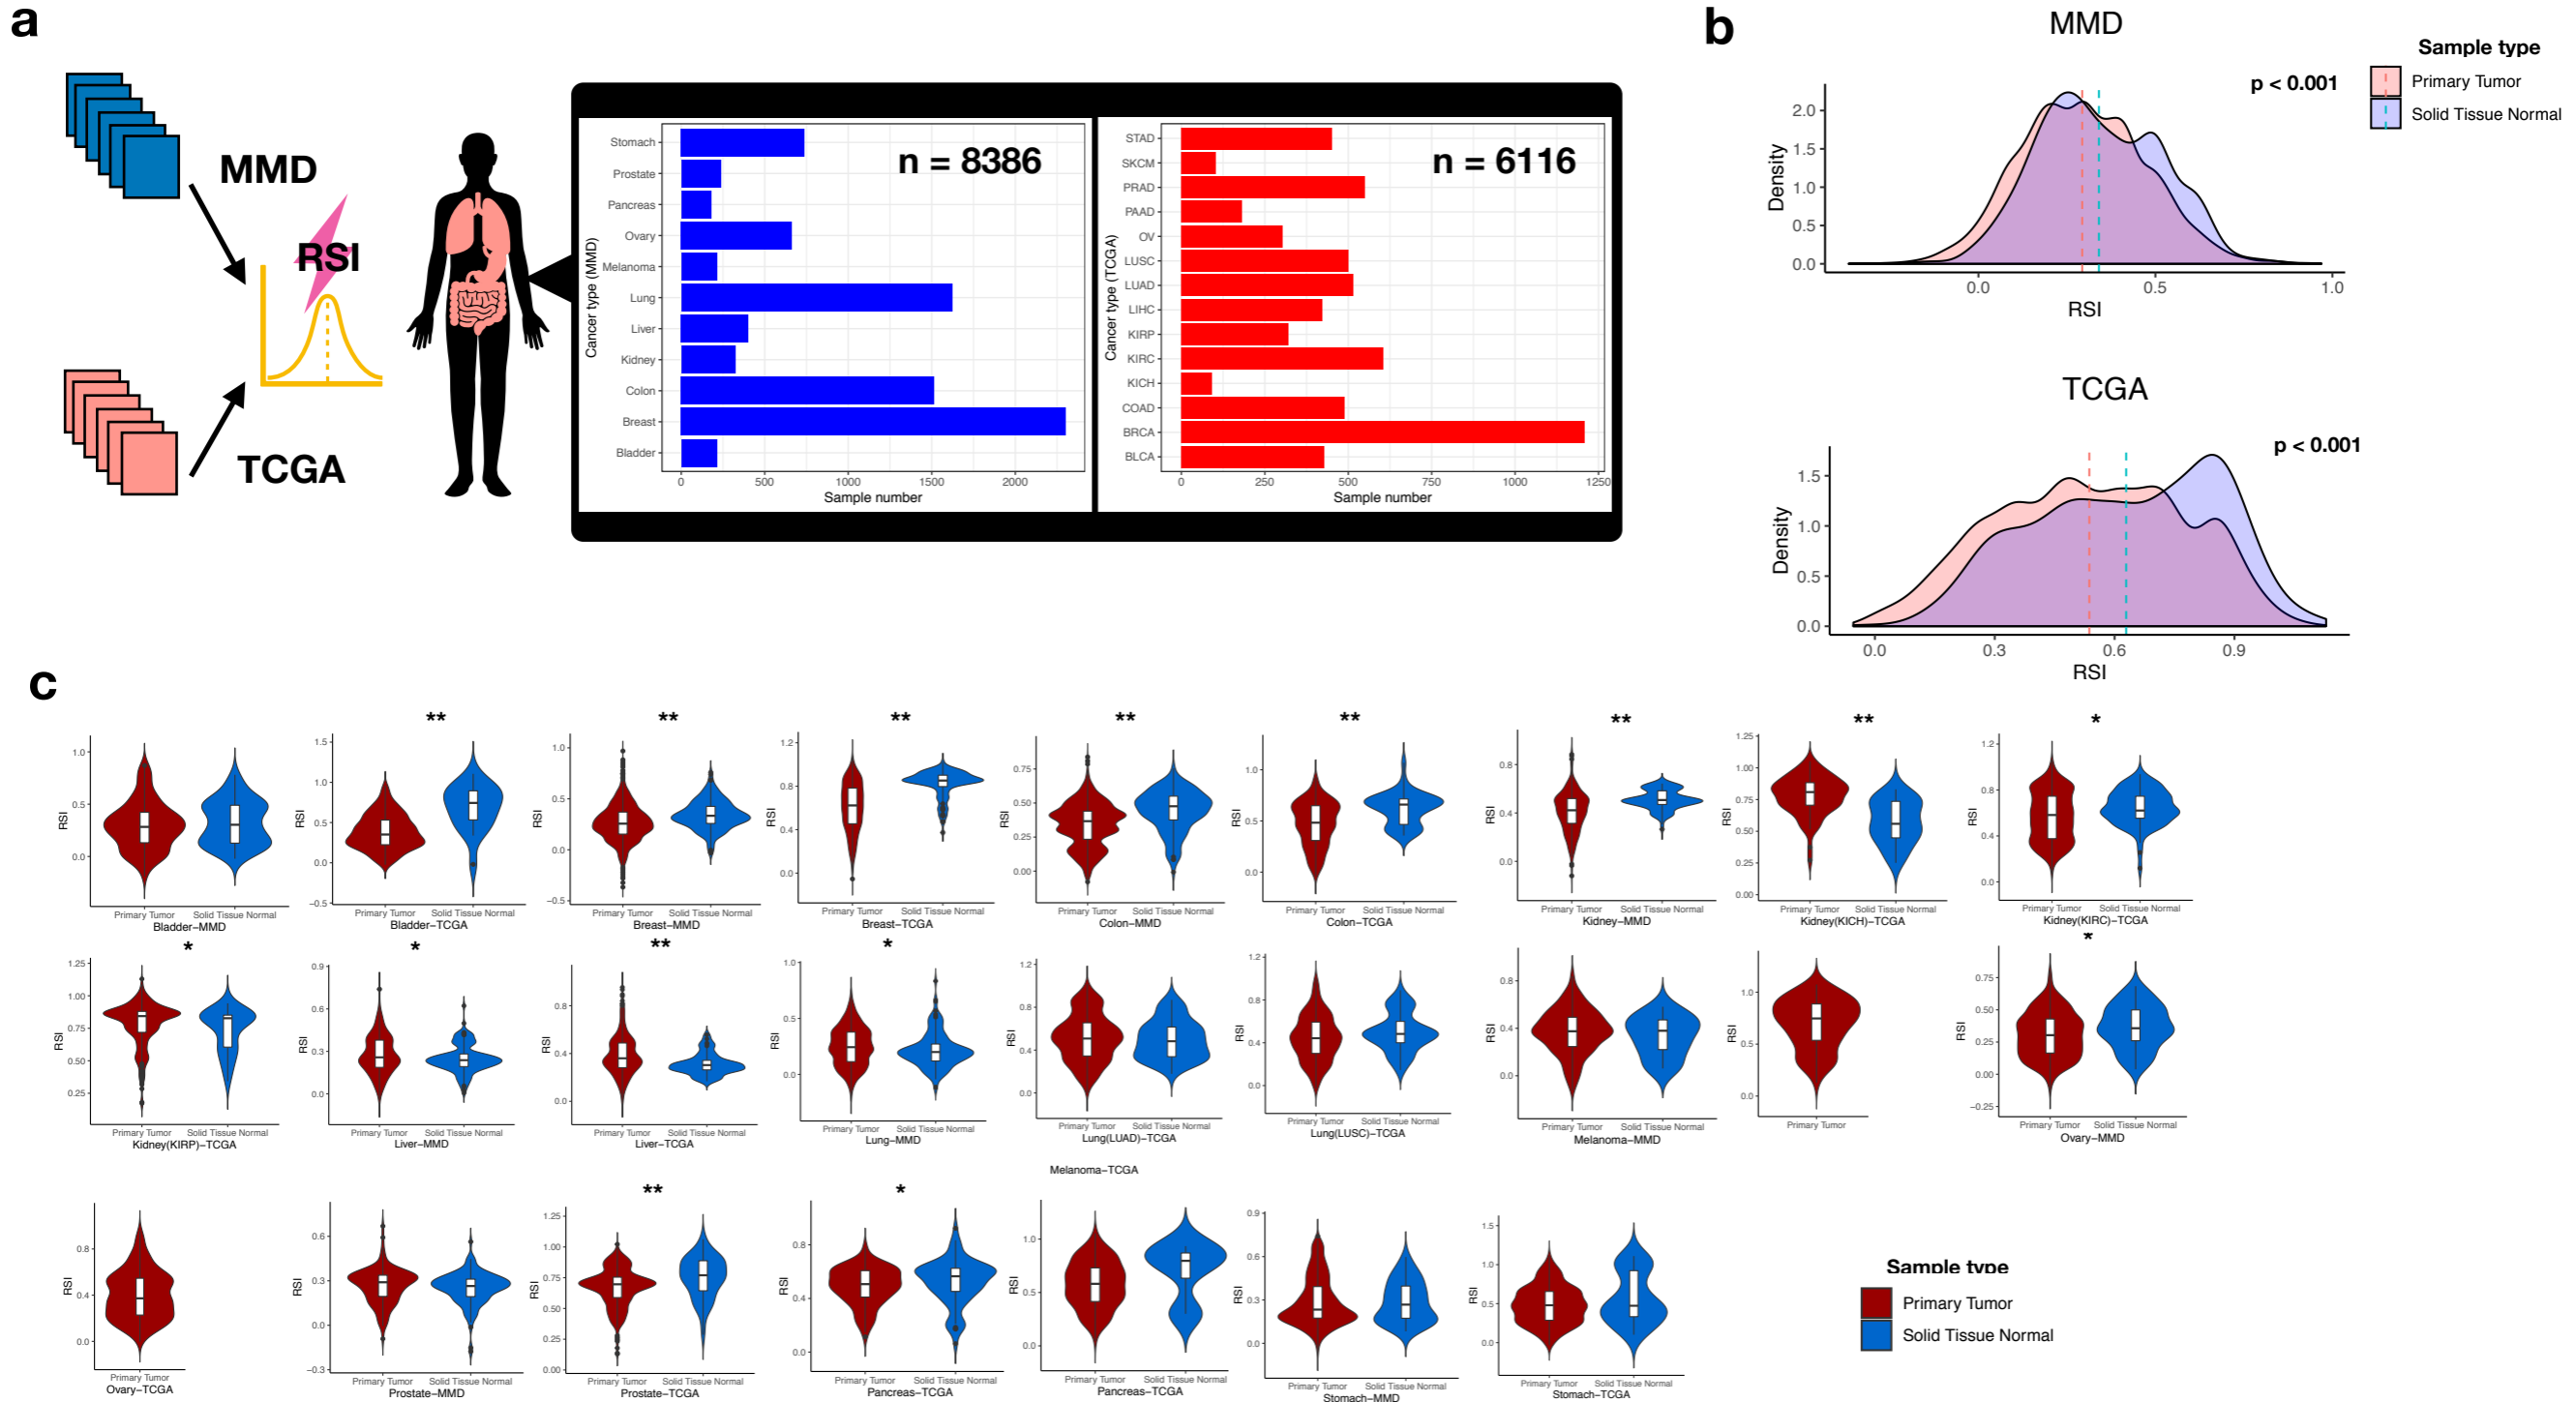

**Supplementary Figure 2: Variation of RSI in 11 major cancer types.**

**a** Illustration of datasets used for characterization of RSI. **b** Density plot analyses depicting RSI distribution in tumour (MMD:  $n = 7286$ , TCGA:  $n = 5546$ ) vs. normal tissues (MMD:  $n = 1100$ , TCGA:  $n = 570$ ). Red and green horizontal dotted lines represent the mean RSI values in the primary tumour and normal tissues, respectively. **c** RSI in normal (solid normal tissue) vs. tumour (primary tumour) tissues across 11 cancer types. The black horizontal lines represent the median. Mann-Whitney U-test  $***p < 0.001$ ,  $**p < 0.01$ ,  $*p < 0.05$ . As melanoma cohort in TCGA does not contain normal tissues, only the tumour tissues are shown.

# Supplementary Figure 3

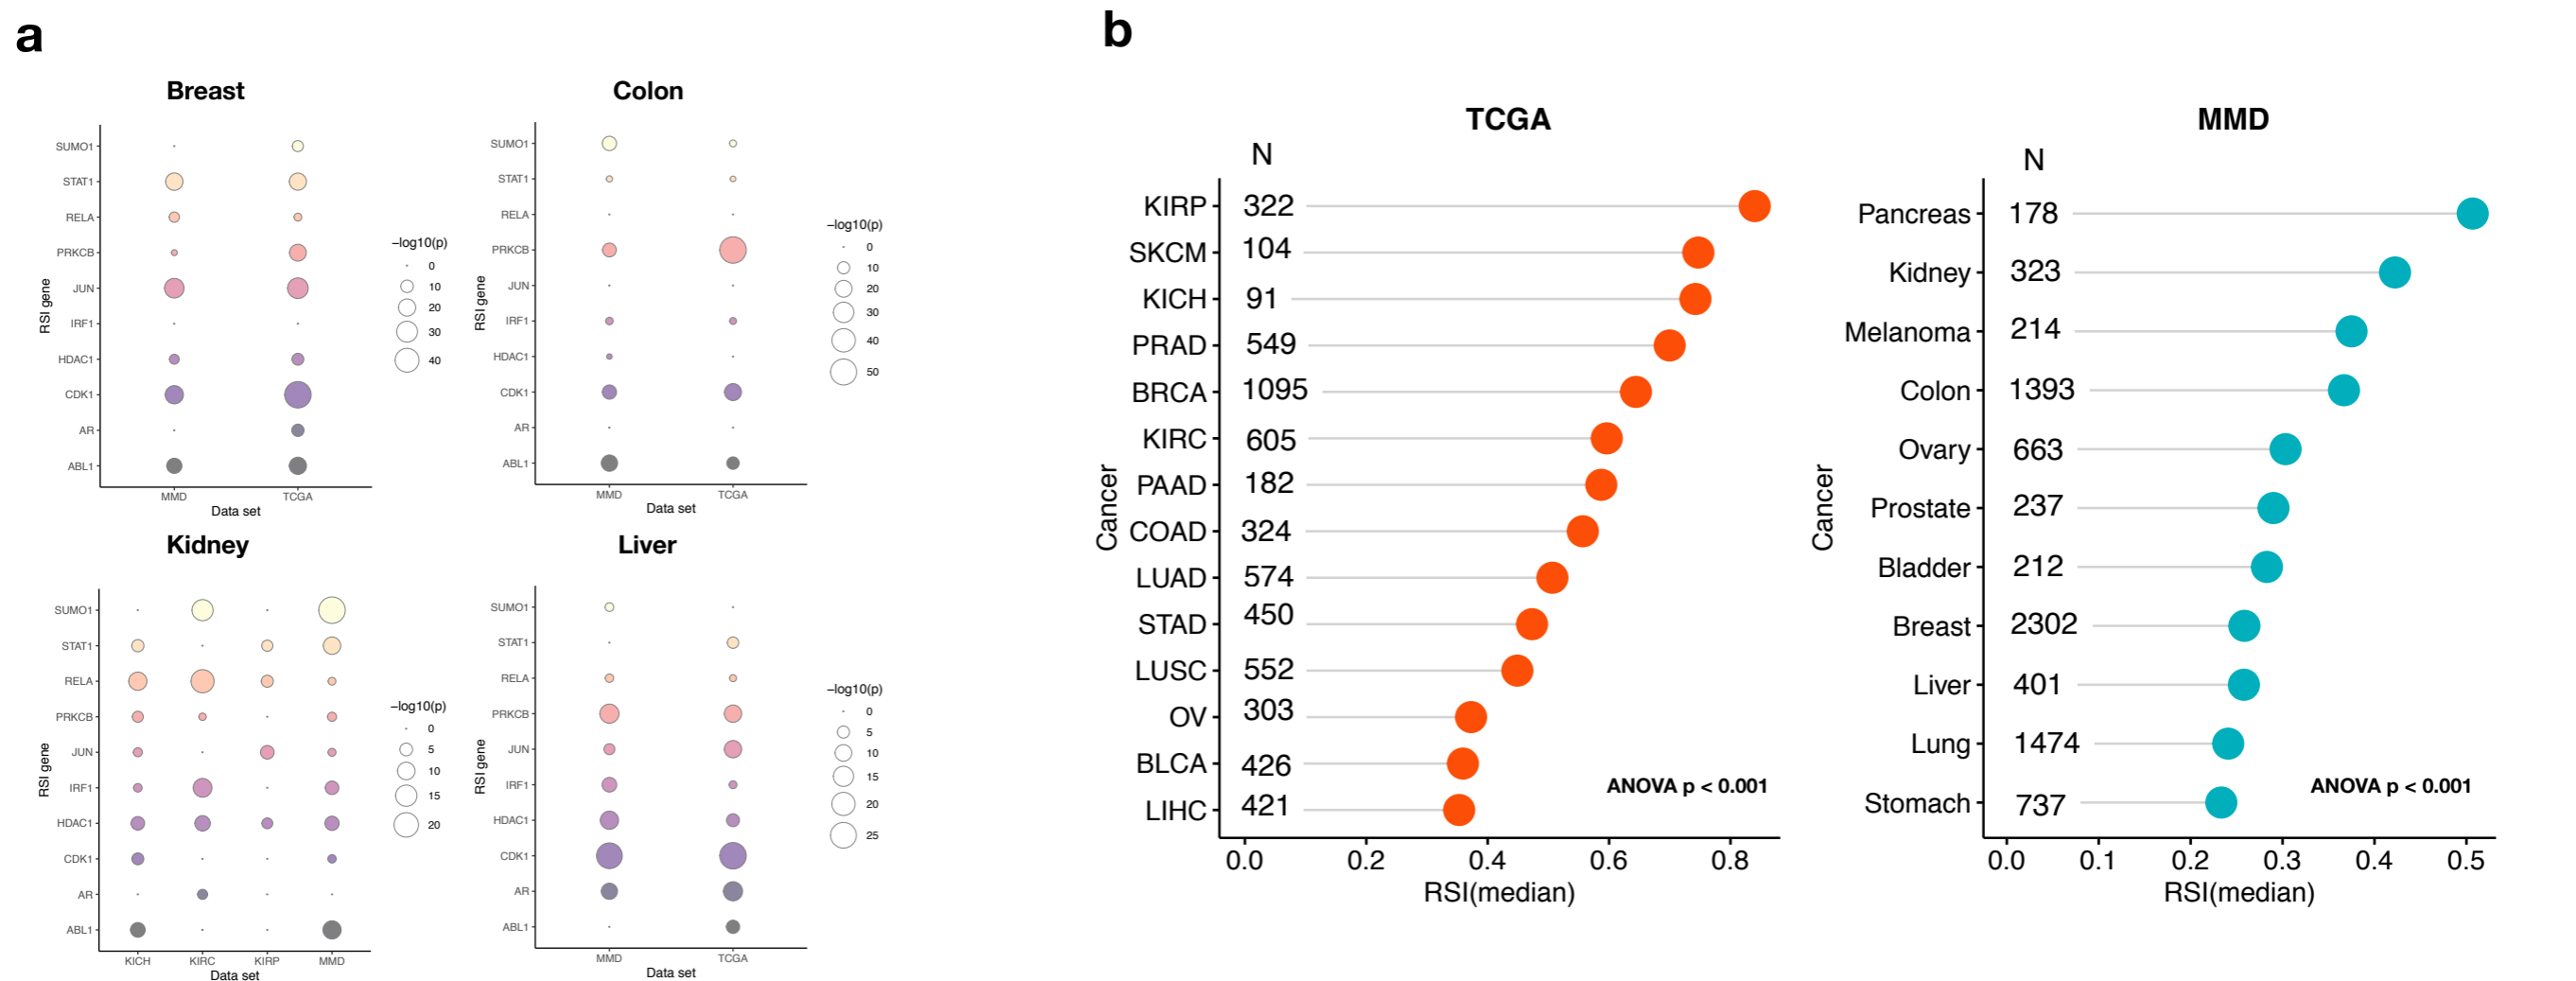

**Supplementary Figure 3: Differences of RSI between tumour and normal tissues and across cancer types. a** RSI gene differences between normal and tumour tissues. p value derived from the Mann–Whitney U-test is transformed to  $-\log_{10}(p)$ . **b** Ranking of median RSI value across the 11 cancer types in TCGA (left panel) and MMD (right panel).

# Supplementary Figure 4

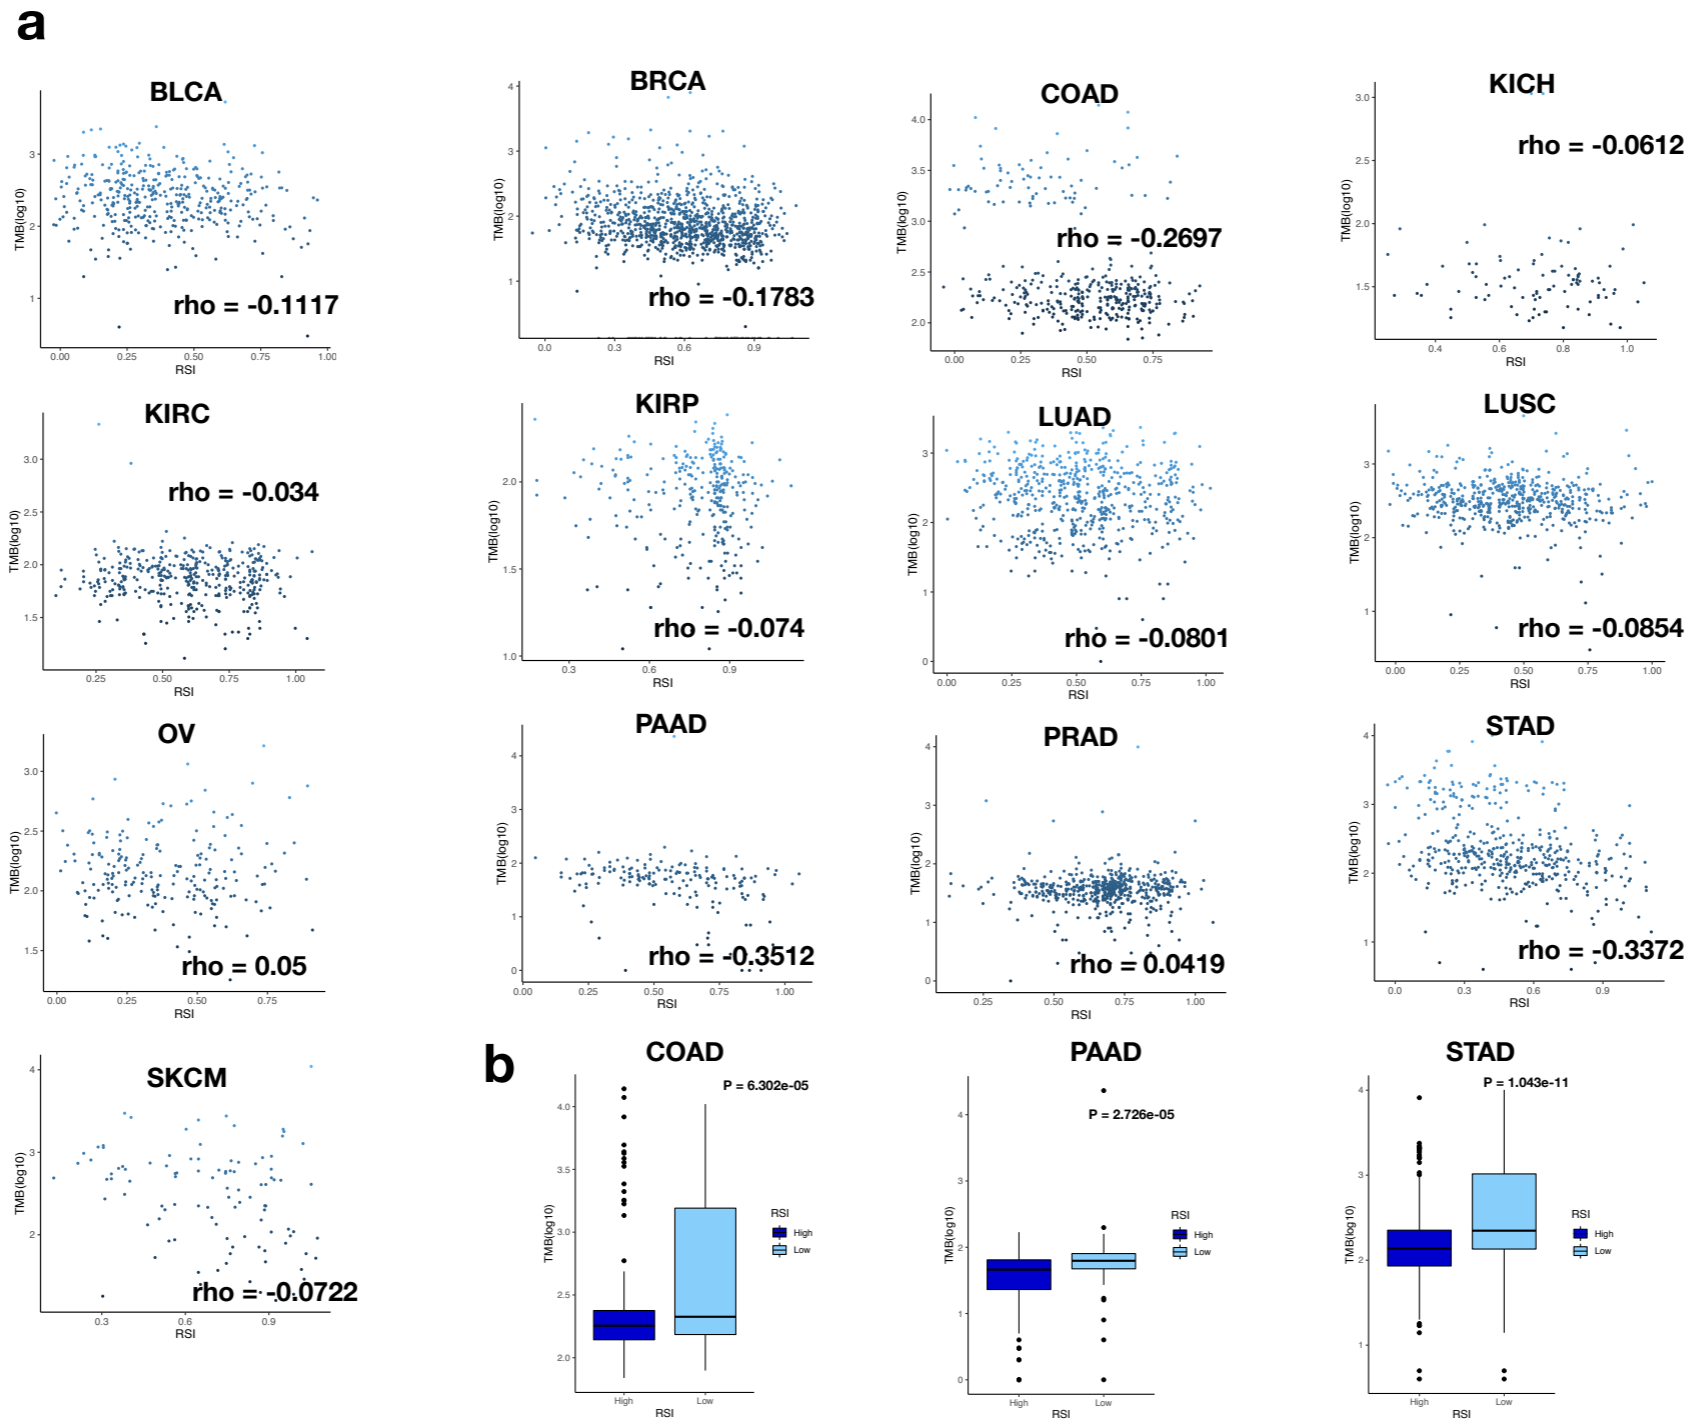

**Supplementary Figure 4: Correlation of RSI with TMB.**

**a** Spearman's correlation between RSI and TMB in the TCGA. TMB was log<sub>10</sub>-transformed for plotting. **b** Distribution of log<sub>10</sub>(TMB) between RSI-High and RSI-Low tumours in COAD, PAAD and STAD.

# Supplementary Figure 5

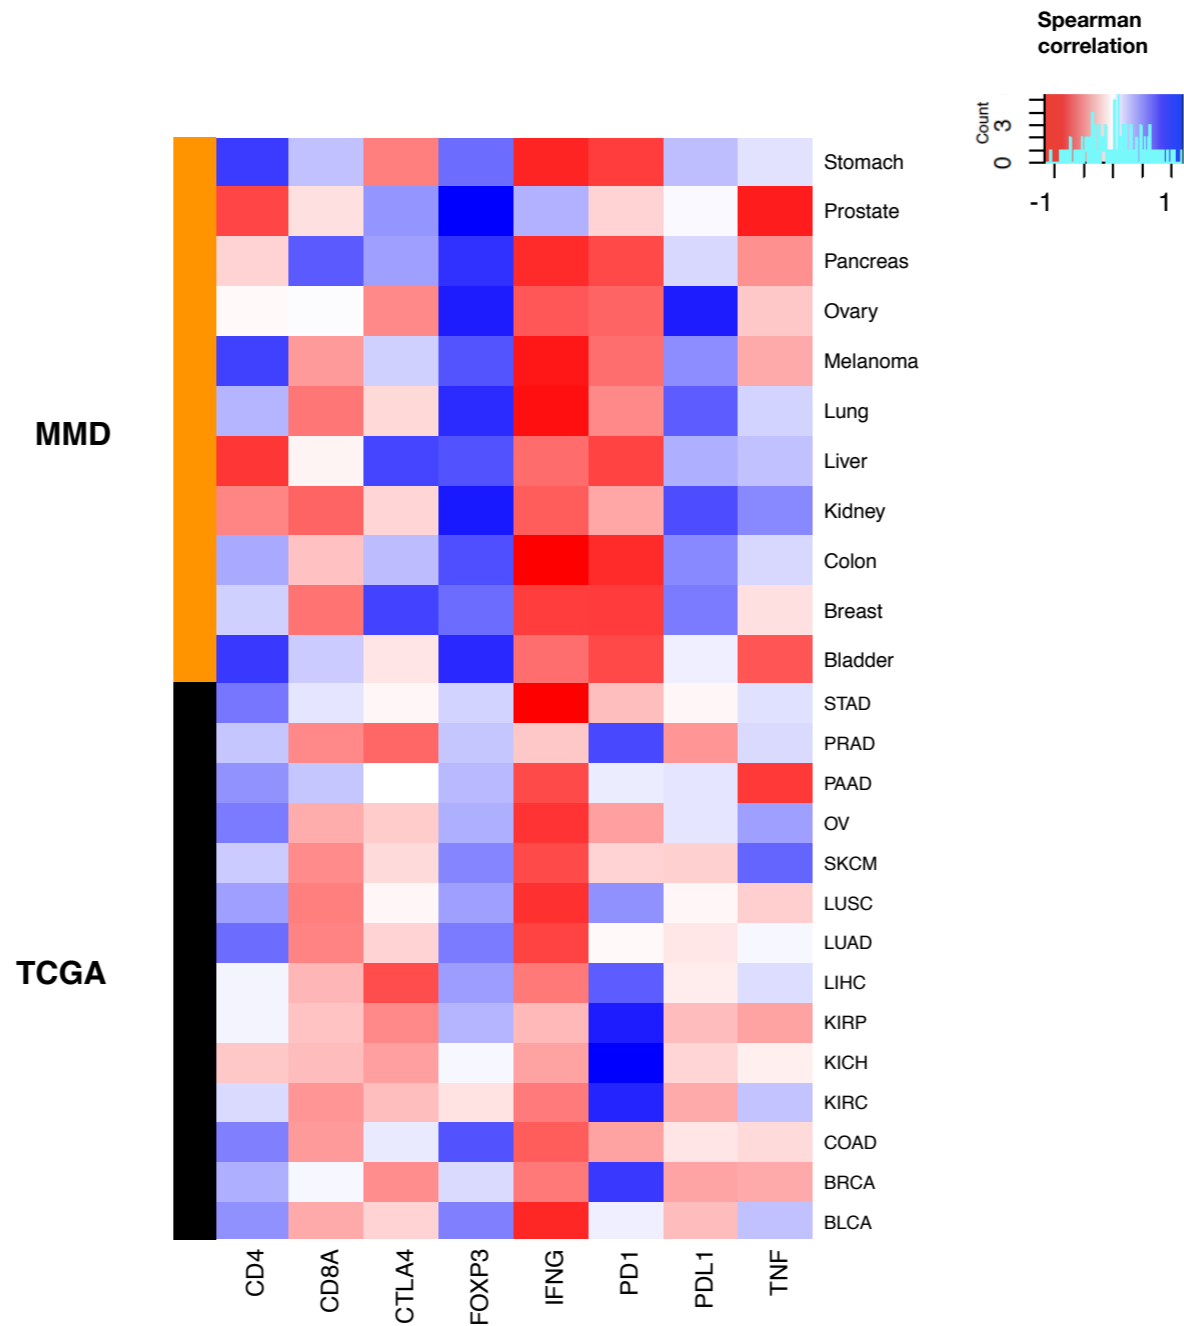

**Supplementary Figure 5: Heatmap depicting Spearman's correlation between RSI and expression of genes related to immunotherapy across 11 major cancer types in TCGA and MMD. Colour bar indicates Spearman's rs.**

# Supplementary Figure 6

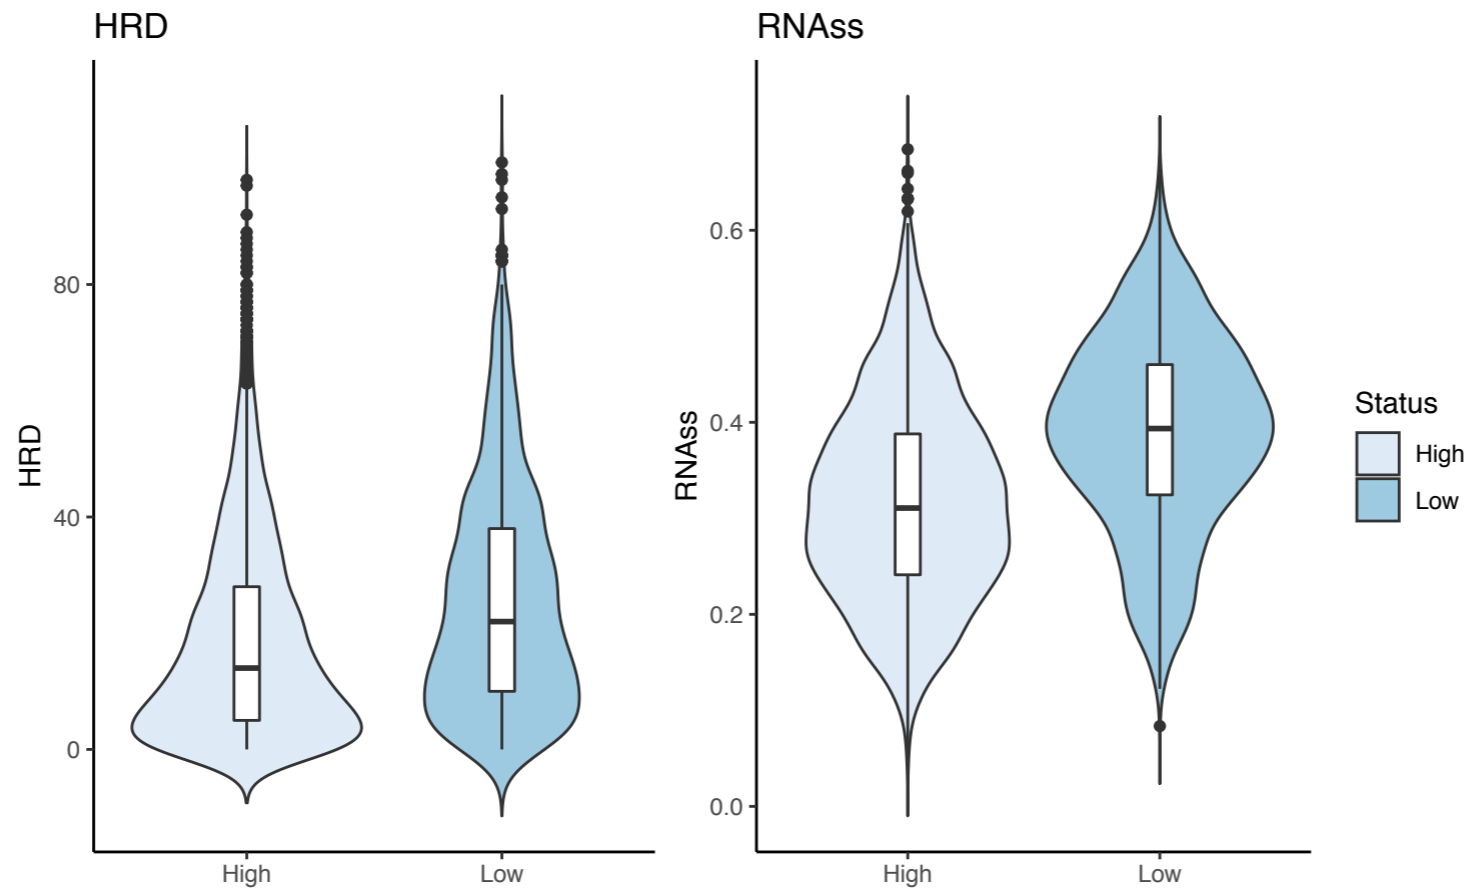

**Supplementary Figure 6: Violin plots showing distribution of HRD and RNAss scores between RSI-High and RSI-Low tumours in TCGA. The black horizontal lines represent the median.**

# Supplementary Figure 7

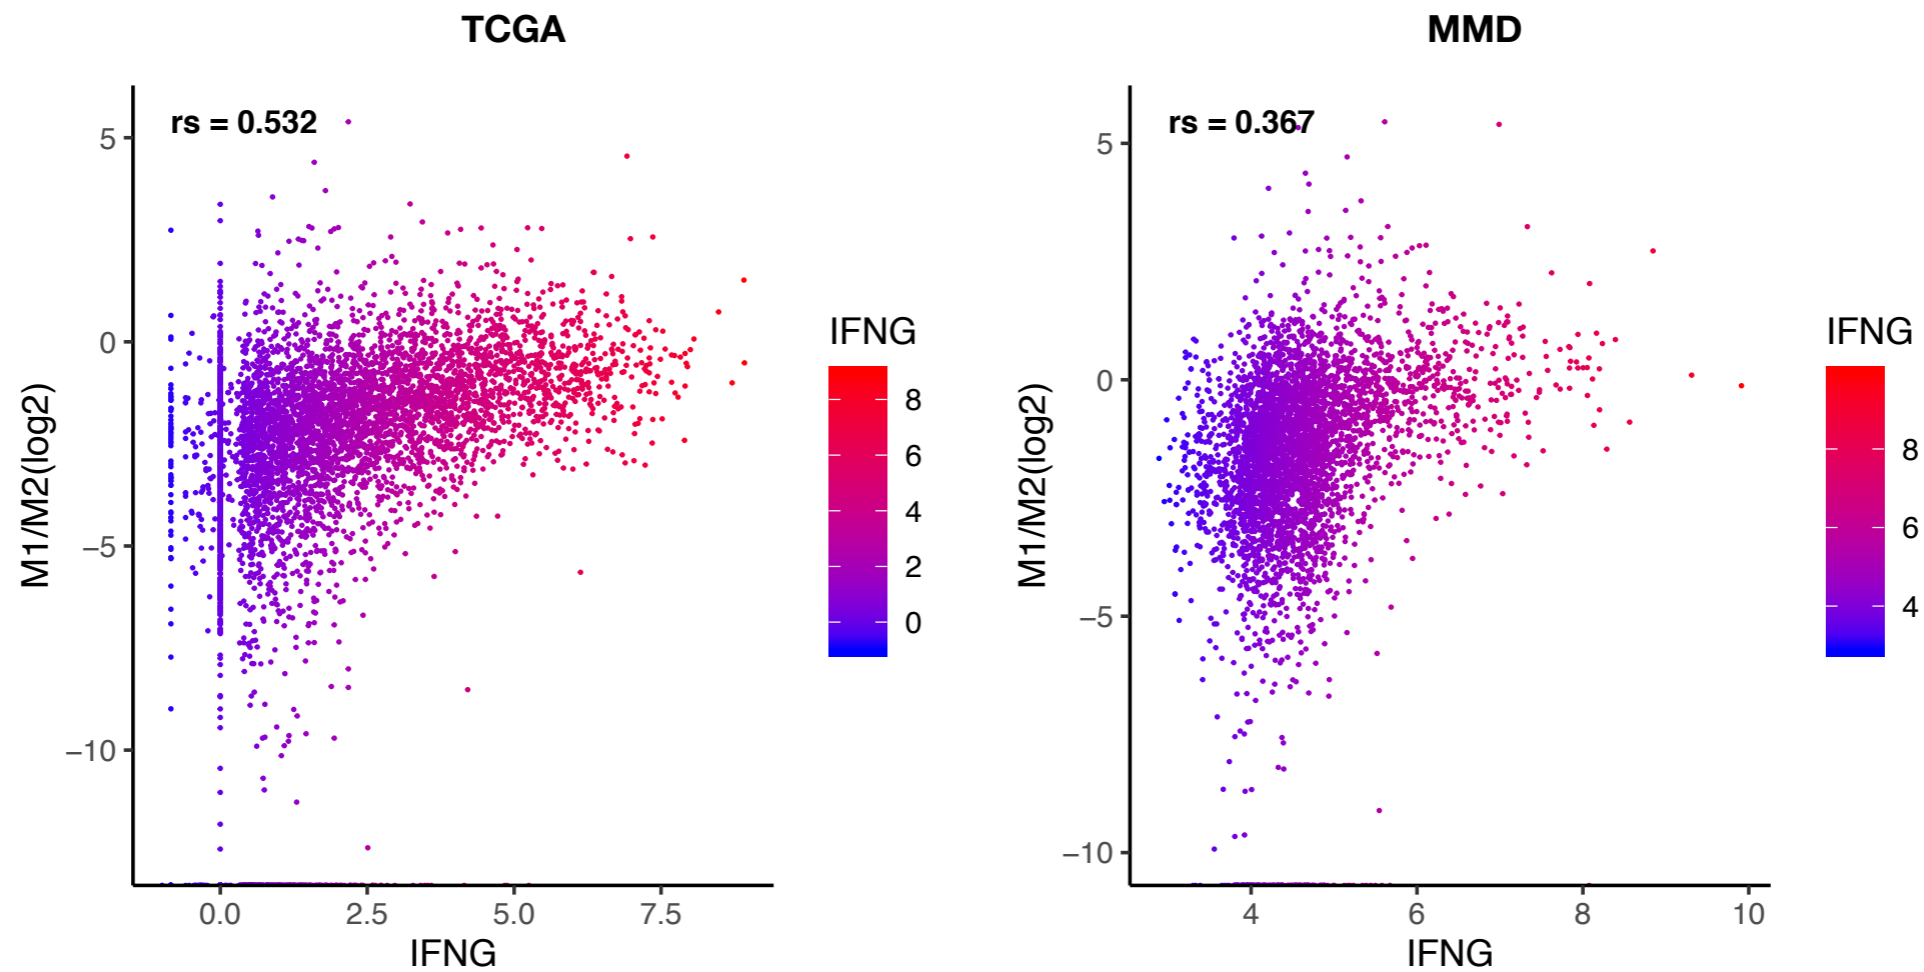

**Supplementary Figure 7: Scatter plots showing correlation between *IFNG* expression and M1/M2 (log2) in TCGA (upper panel) and MMD (lower panel). M1: Macrophage M1; M2: macrophage M2.**



# Supplementary Figure 8

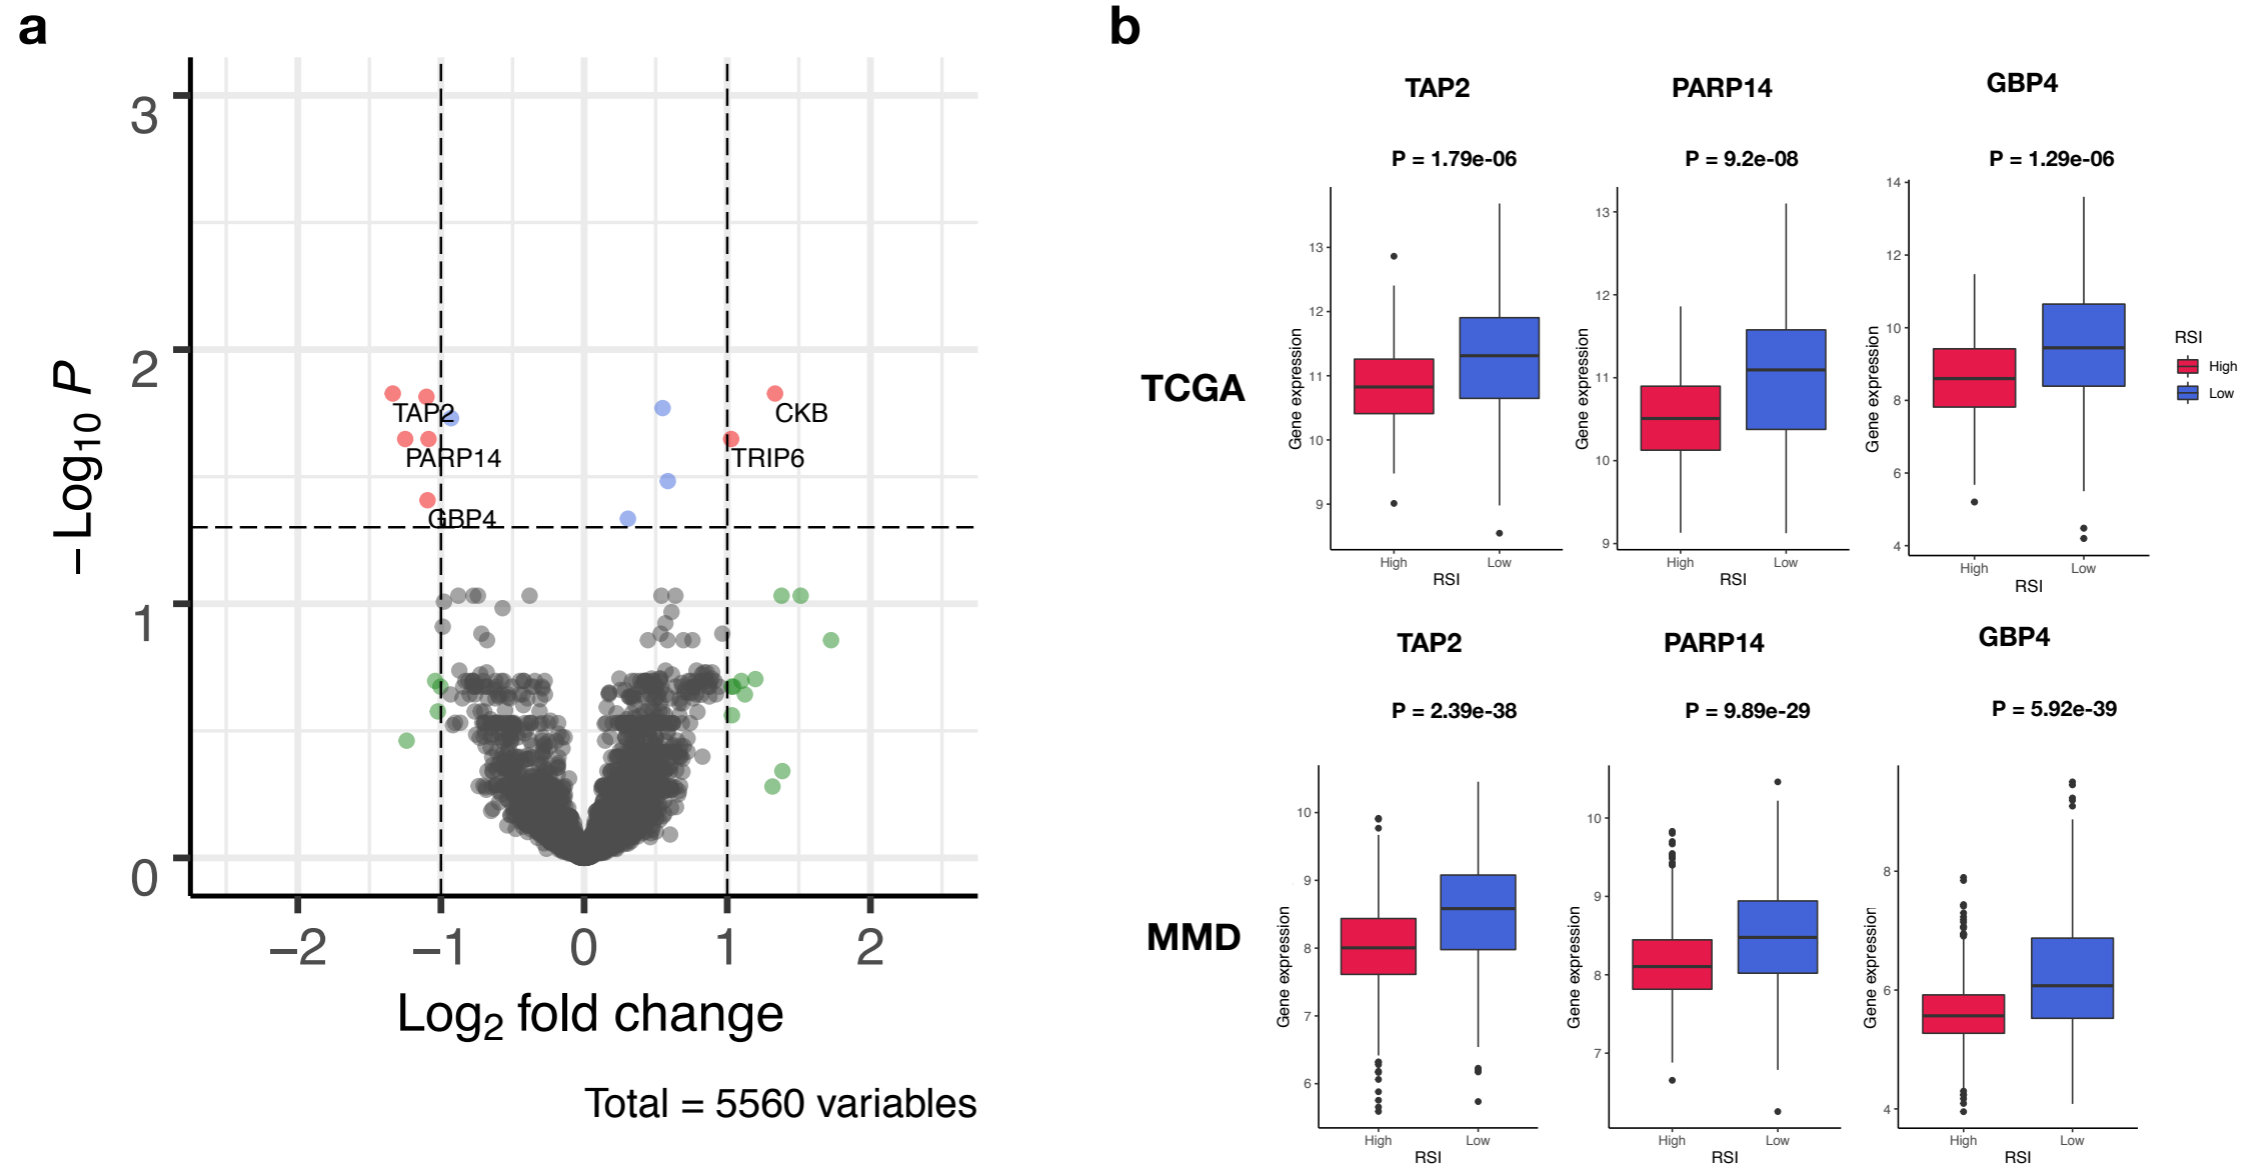

**Supplementary Figure 8: Proteomic analysis.**

**a** Volcano plot illustrating differentially expressed proteins in the RSI-High and RSI-Low tumours. Red dots indicate proteins with  $\text{FC} > 1$  or  $< -1$  and adjusted  $P < 0.05$ . Blue dots represent proteins with  $-1 < \text{FC} < 1$  and adjusted  $P < 0.05$ . Green dots represent proteins with  $\text{FC} > 1$  or  $< -1$  and adjusted  $P > 0.05$ . (B) Box plots showing expression of *TAP2*, *PARP14* and *GBP4* between RSI-High and RSI-Low tumours in TCGA (upper panel) and MMD (lower panel). The box hinges represent the 1st and 3rd quartiles, while the middle black horizontal lines indicate the median.

# Supplementary Figure 9

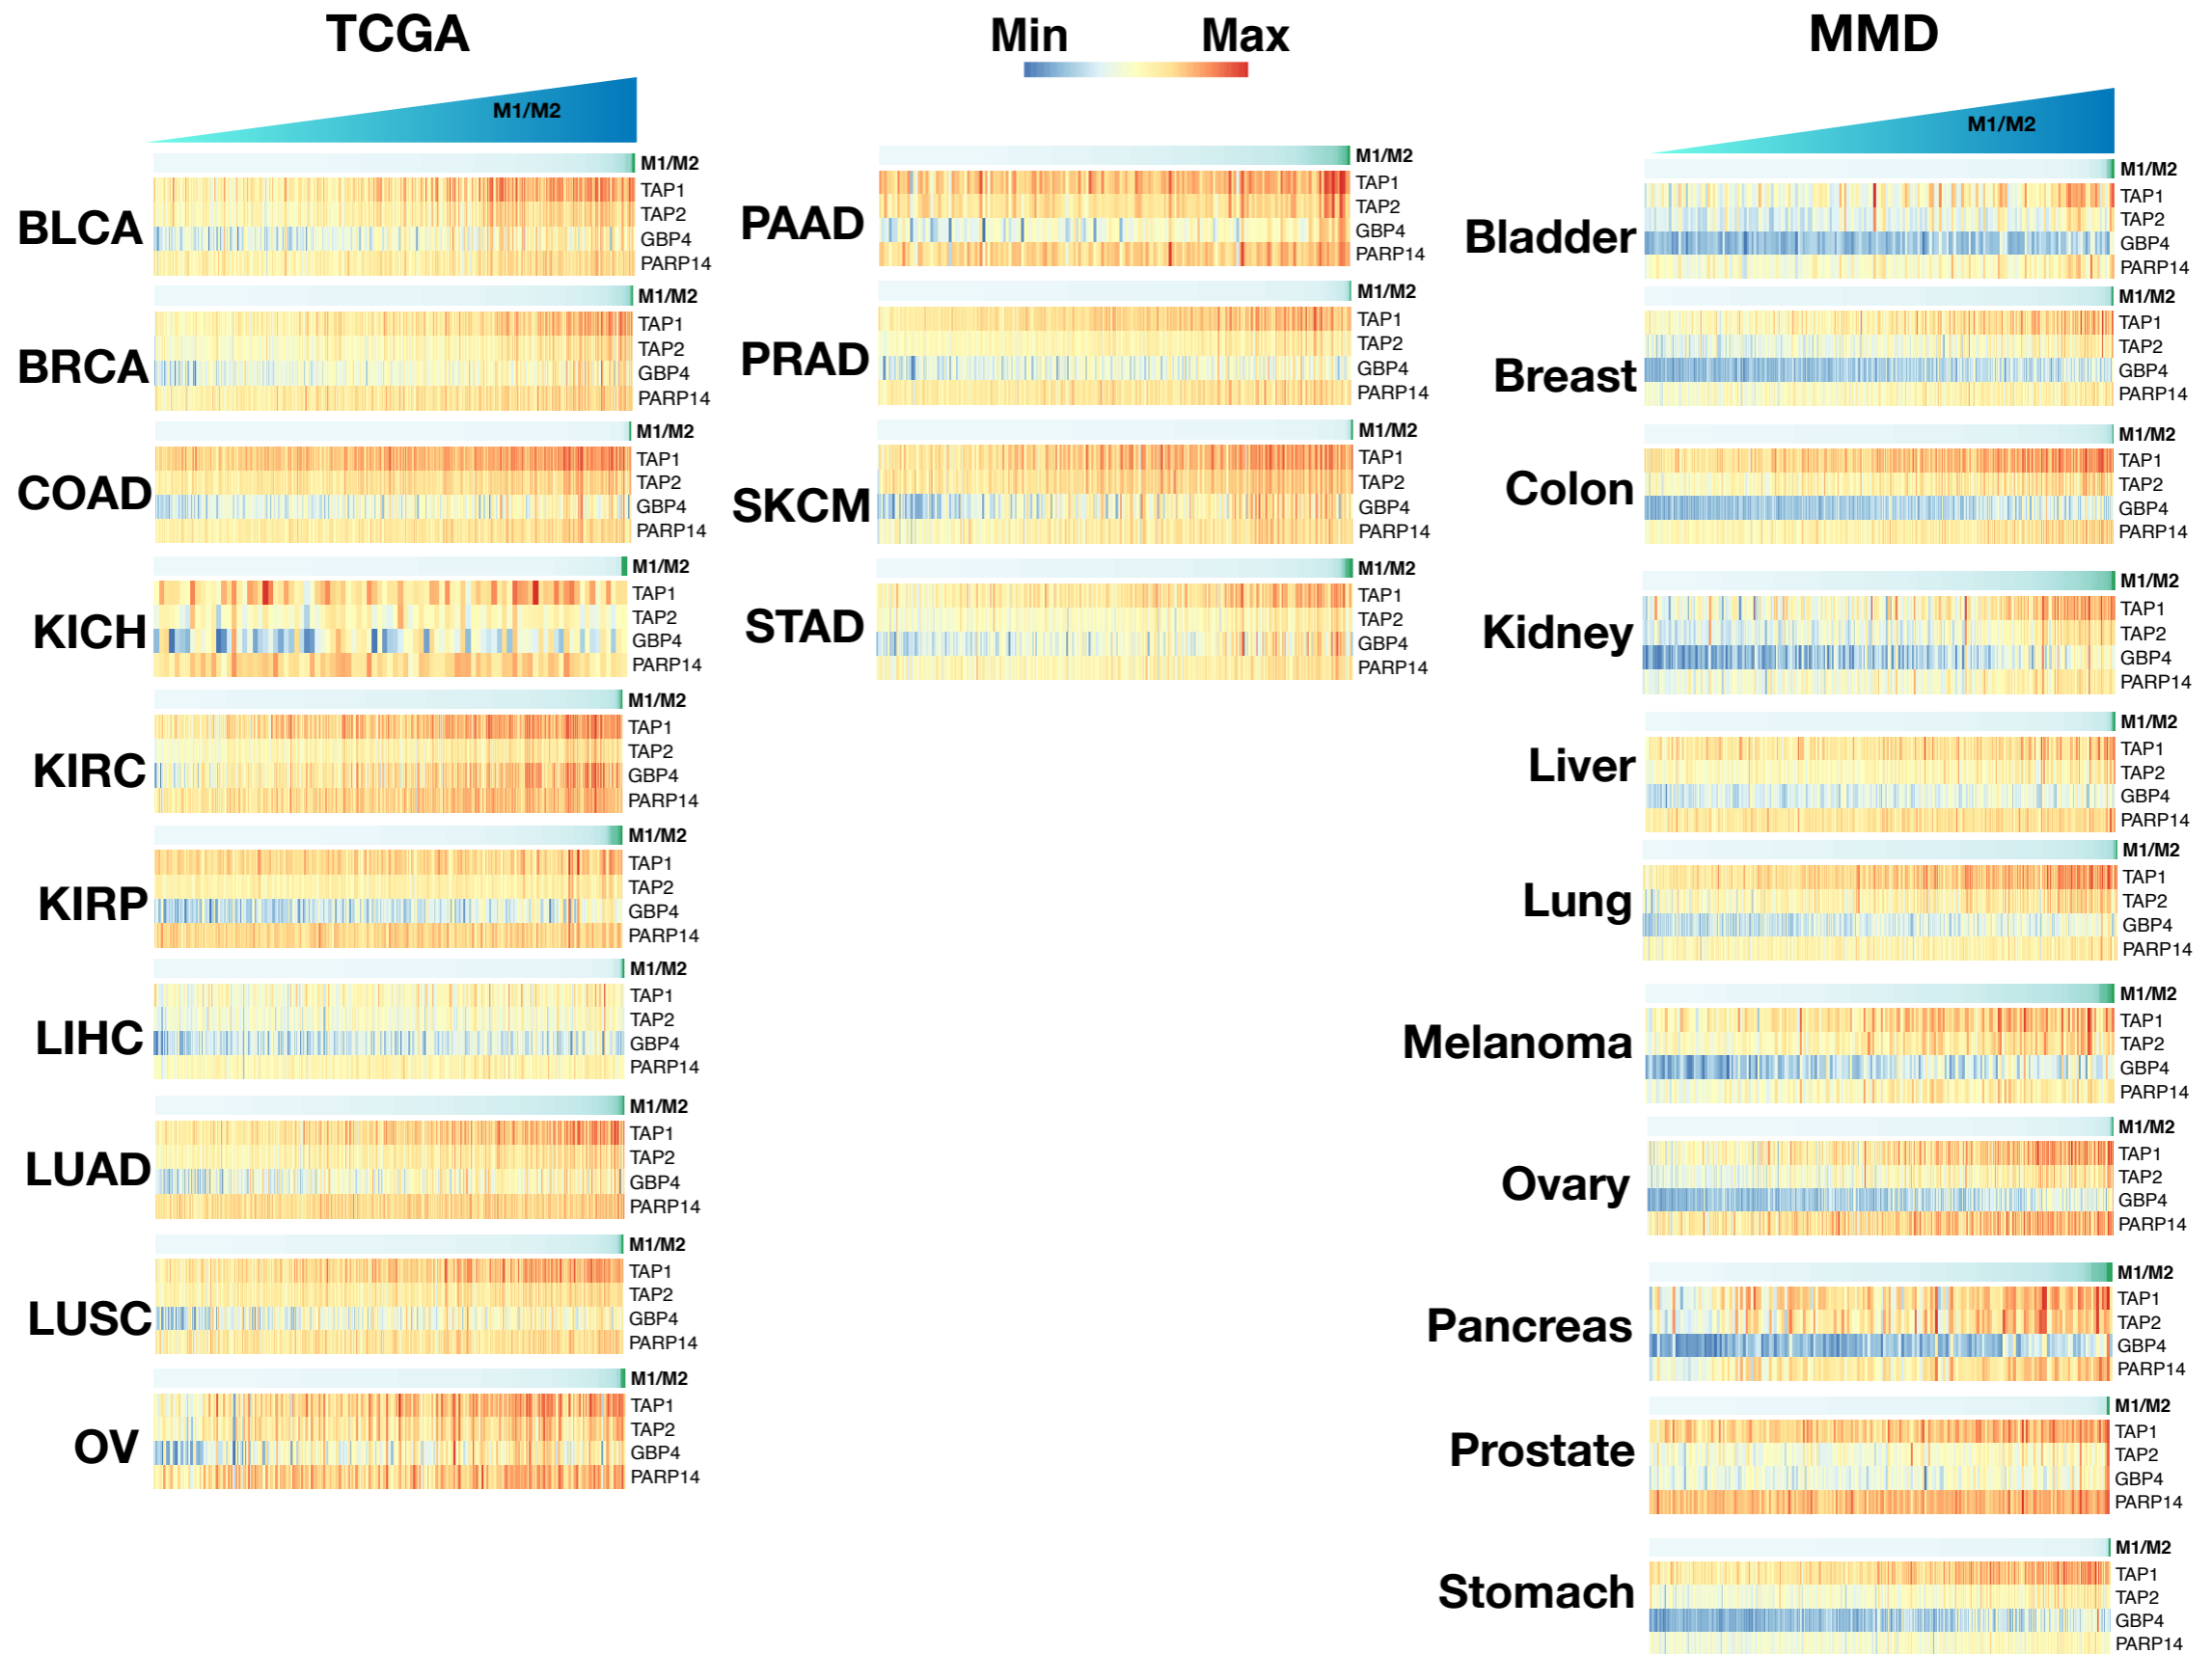

**Supplementary Figure 9: Heatmaps showing gene expression level of *TAP1*, *TAP2*, *PARP14*, and *GBP4*.** Columns have been ordered based on increasing M1/M2 ratio. M1: Macrophage M1; M2: macrophage M2.

# Supplementary Figure 10

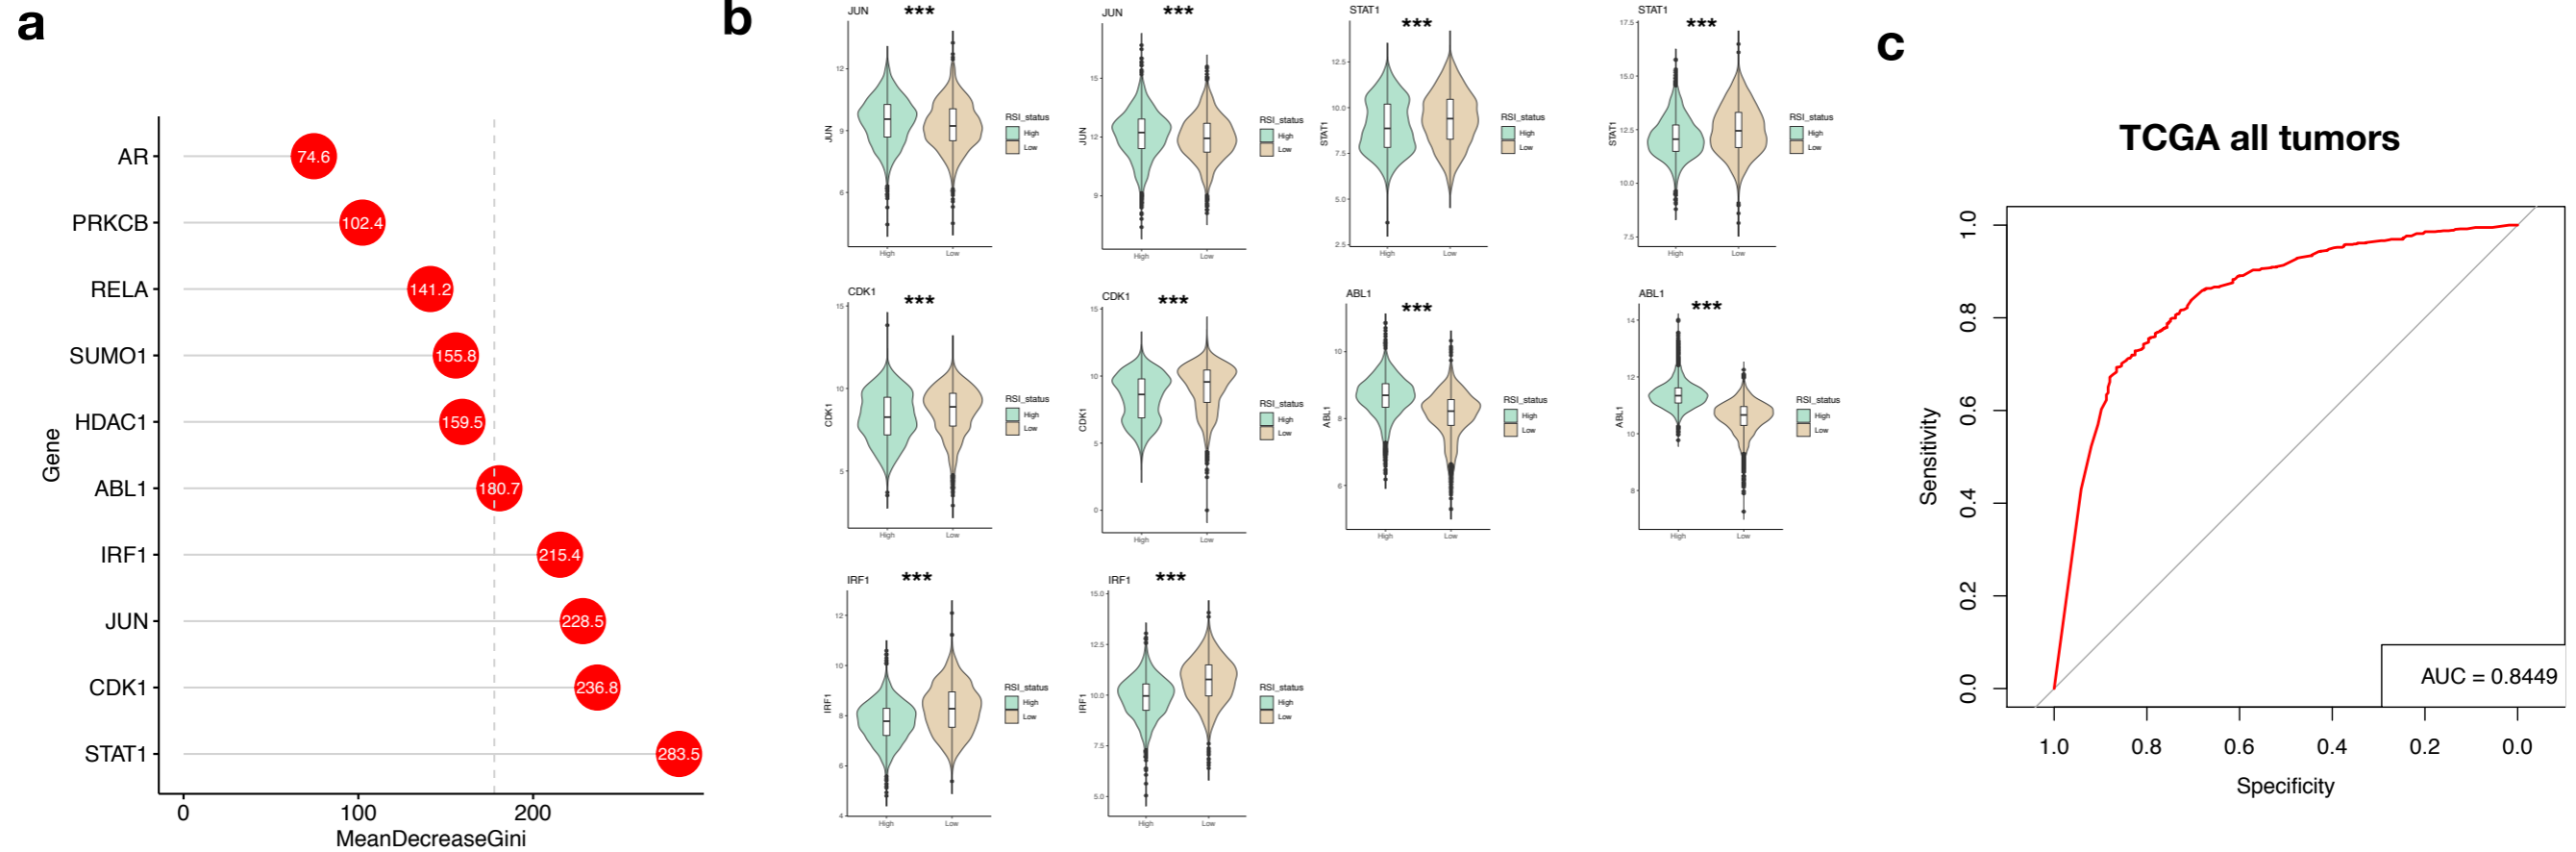

**Supplementary Figure 10: Classifier of C2 immune subtype.**

**a** Mean decrease in Gini for the 10 RSI genes in classification of C2 subtype. Gray horizontal dotted line indicates a MDG of 177.8. **b** Expression of *JUN*, *CDK1*, *IRF1*, *STAT1* and *ABL1* between RSI-High and RSI-Low tumours in the TCGA (left panel) and MMD (right panel). **c** Receiver operating characteristic curve for the established model in predicting C2 subtype.

# Supplementary Figure 11

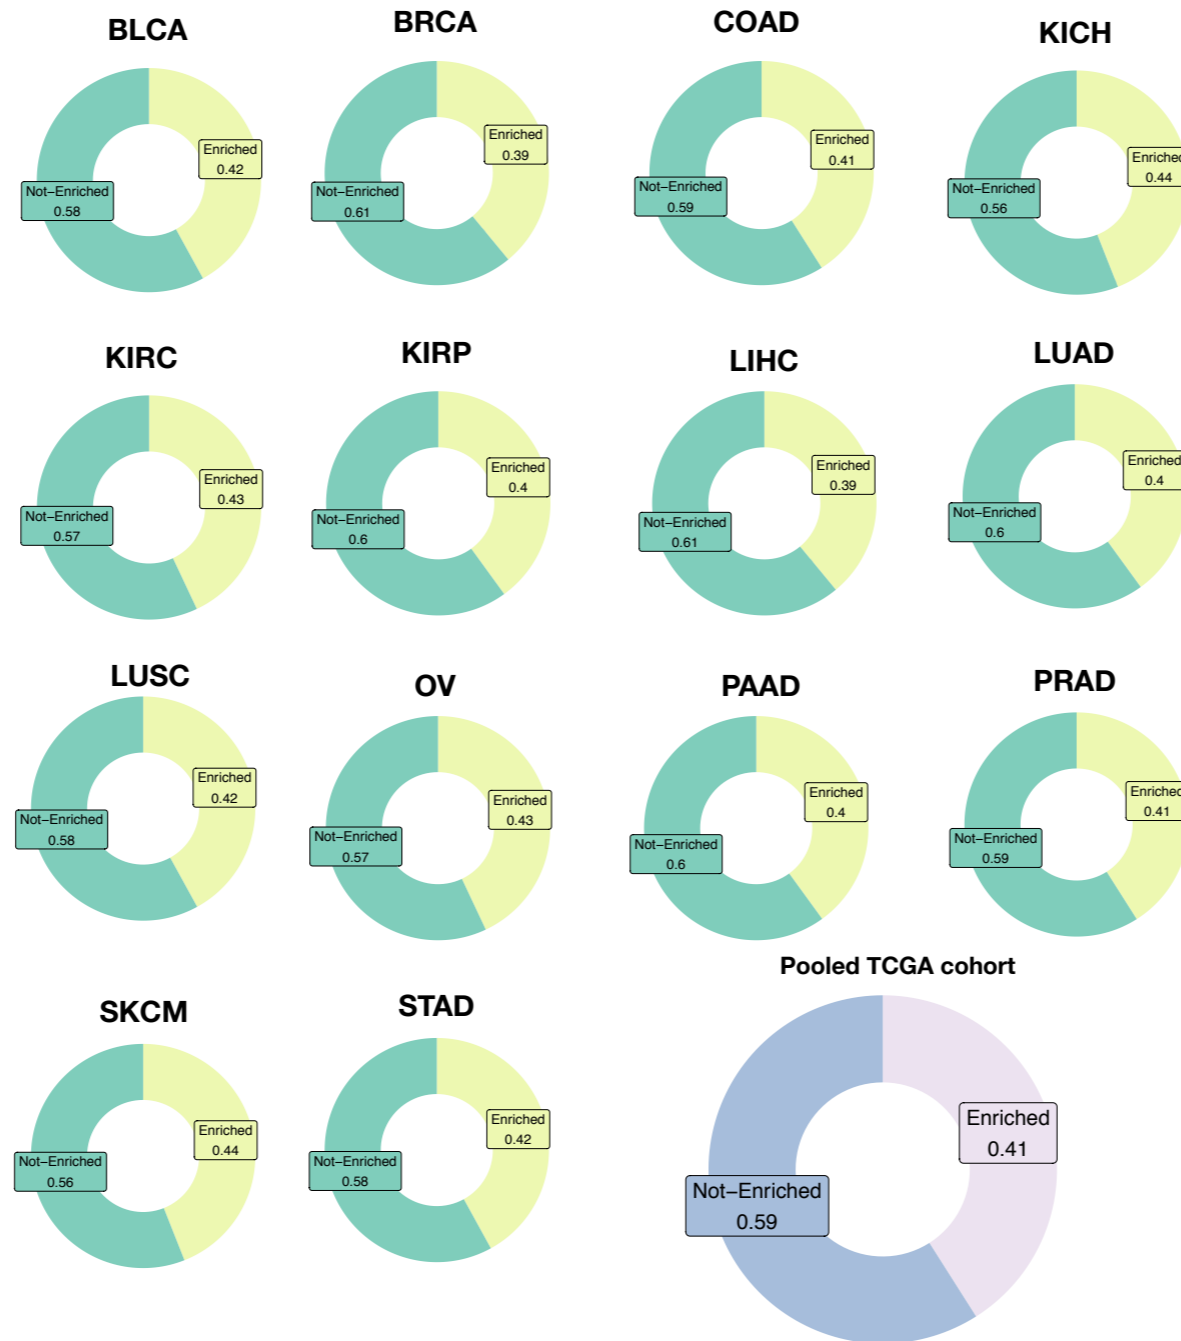

**Supplementary Figure 11: Donut plots depicting percentages of TCIA-enriched and not-enriched tumour samples in the 11 TCGA cancer cohorts.**

# Supplementary Figure 12

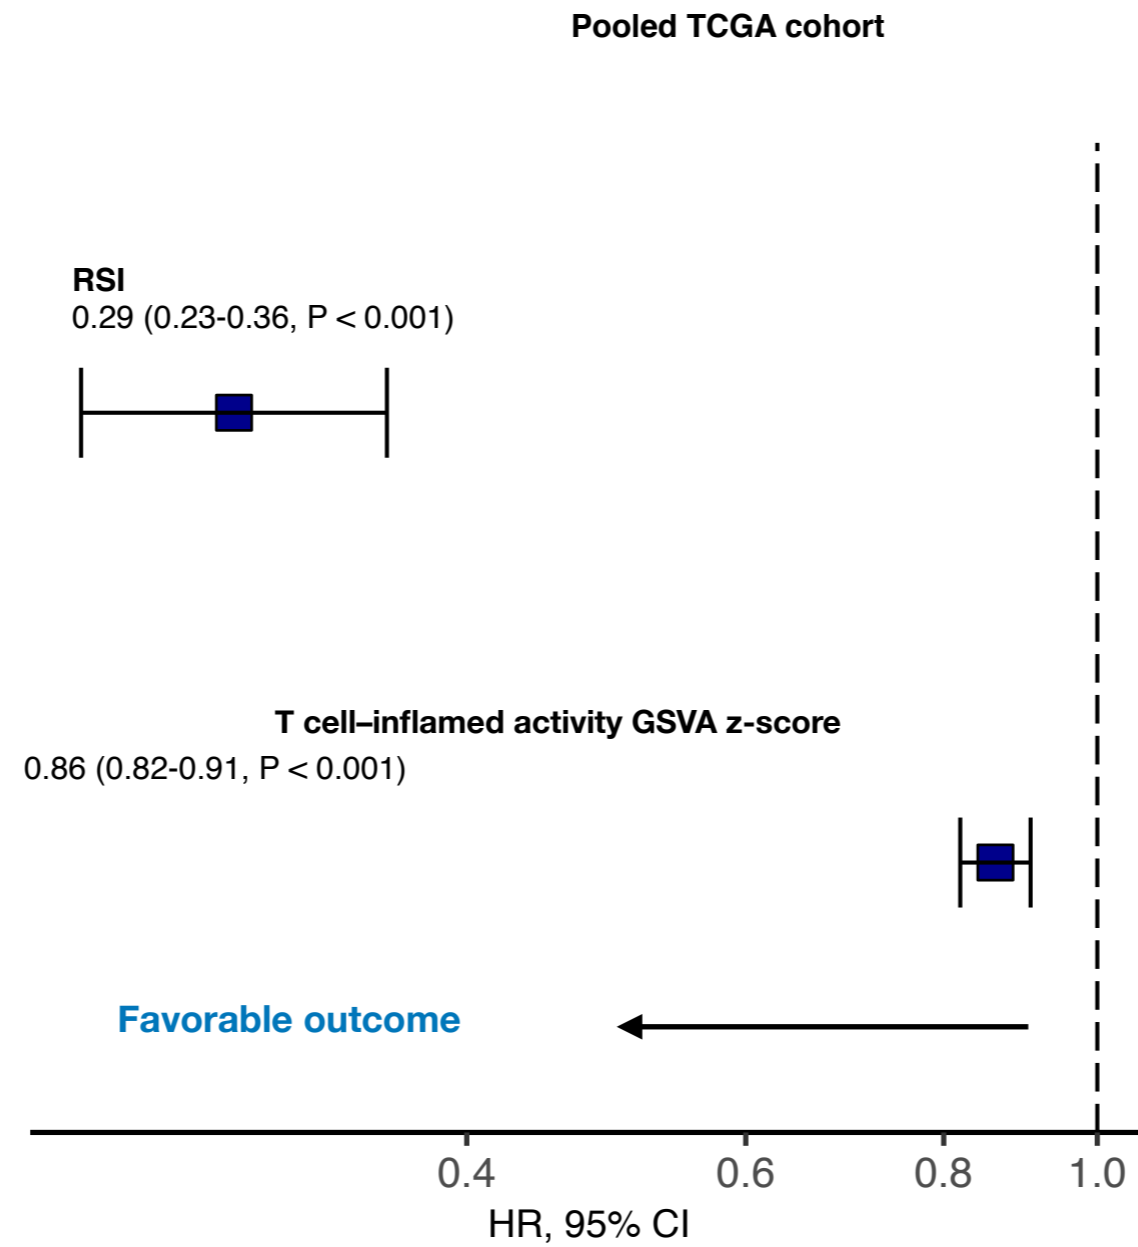

**Supplementary Figure 12: Hazard ratio plot indicating favourable overall survival with high RSI and TCIA in the pooled TCGA cohort with the 11 cancer types.**

# Supplementary Figure 13

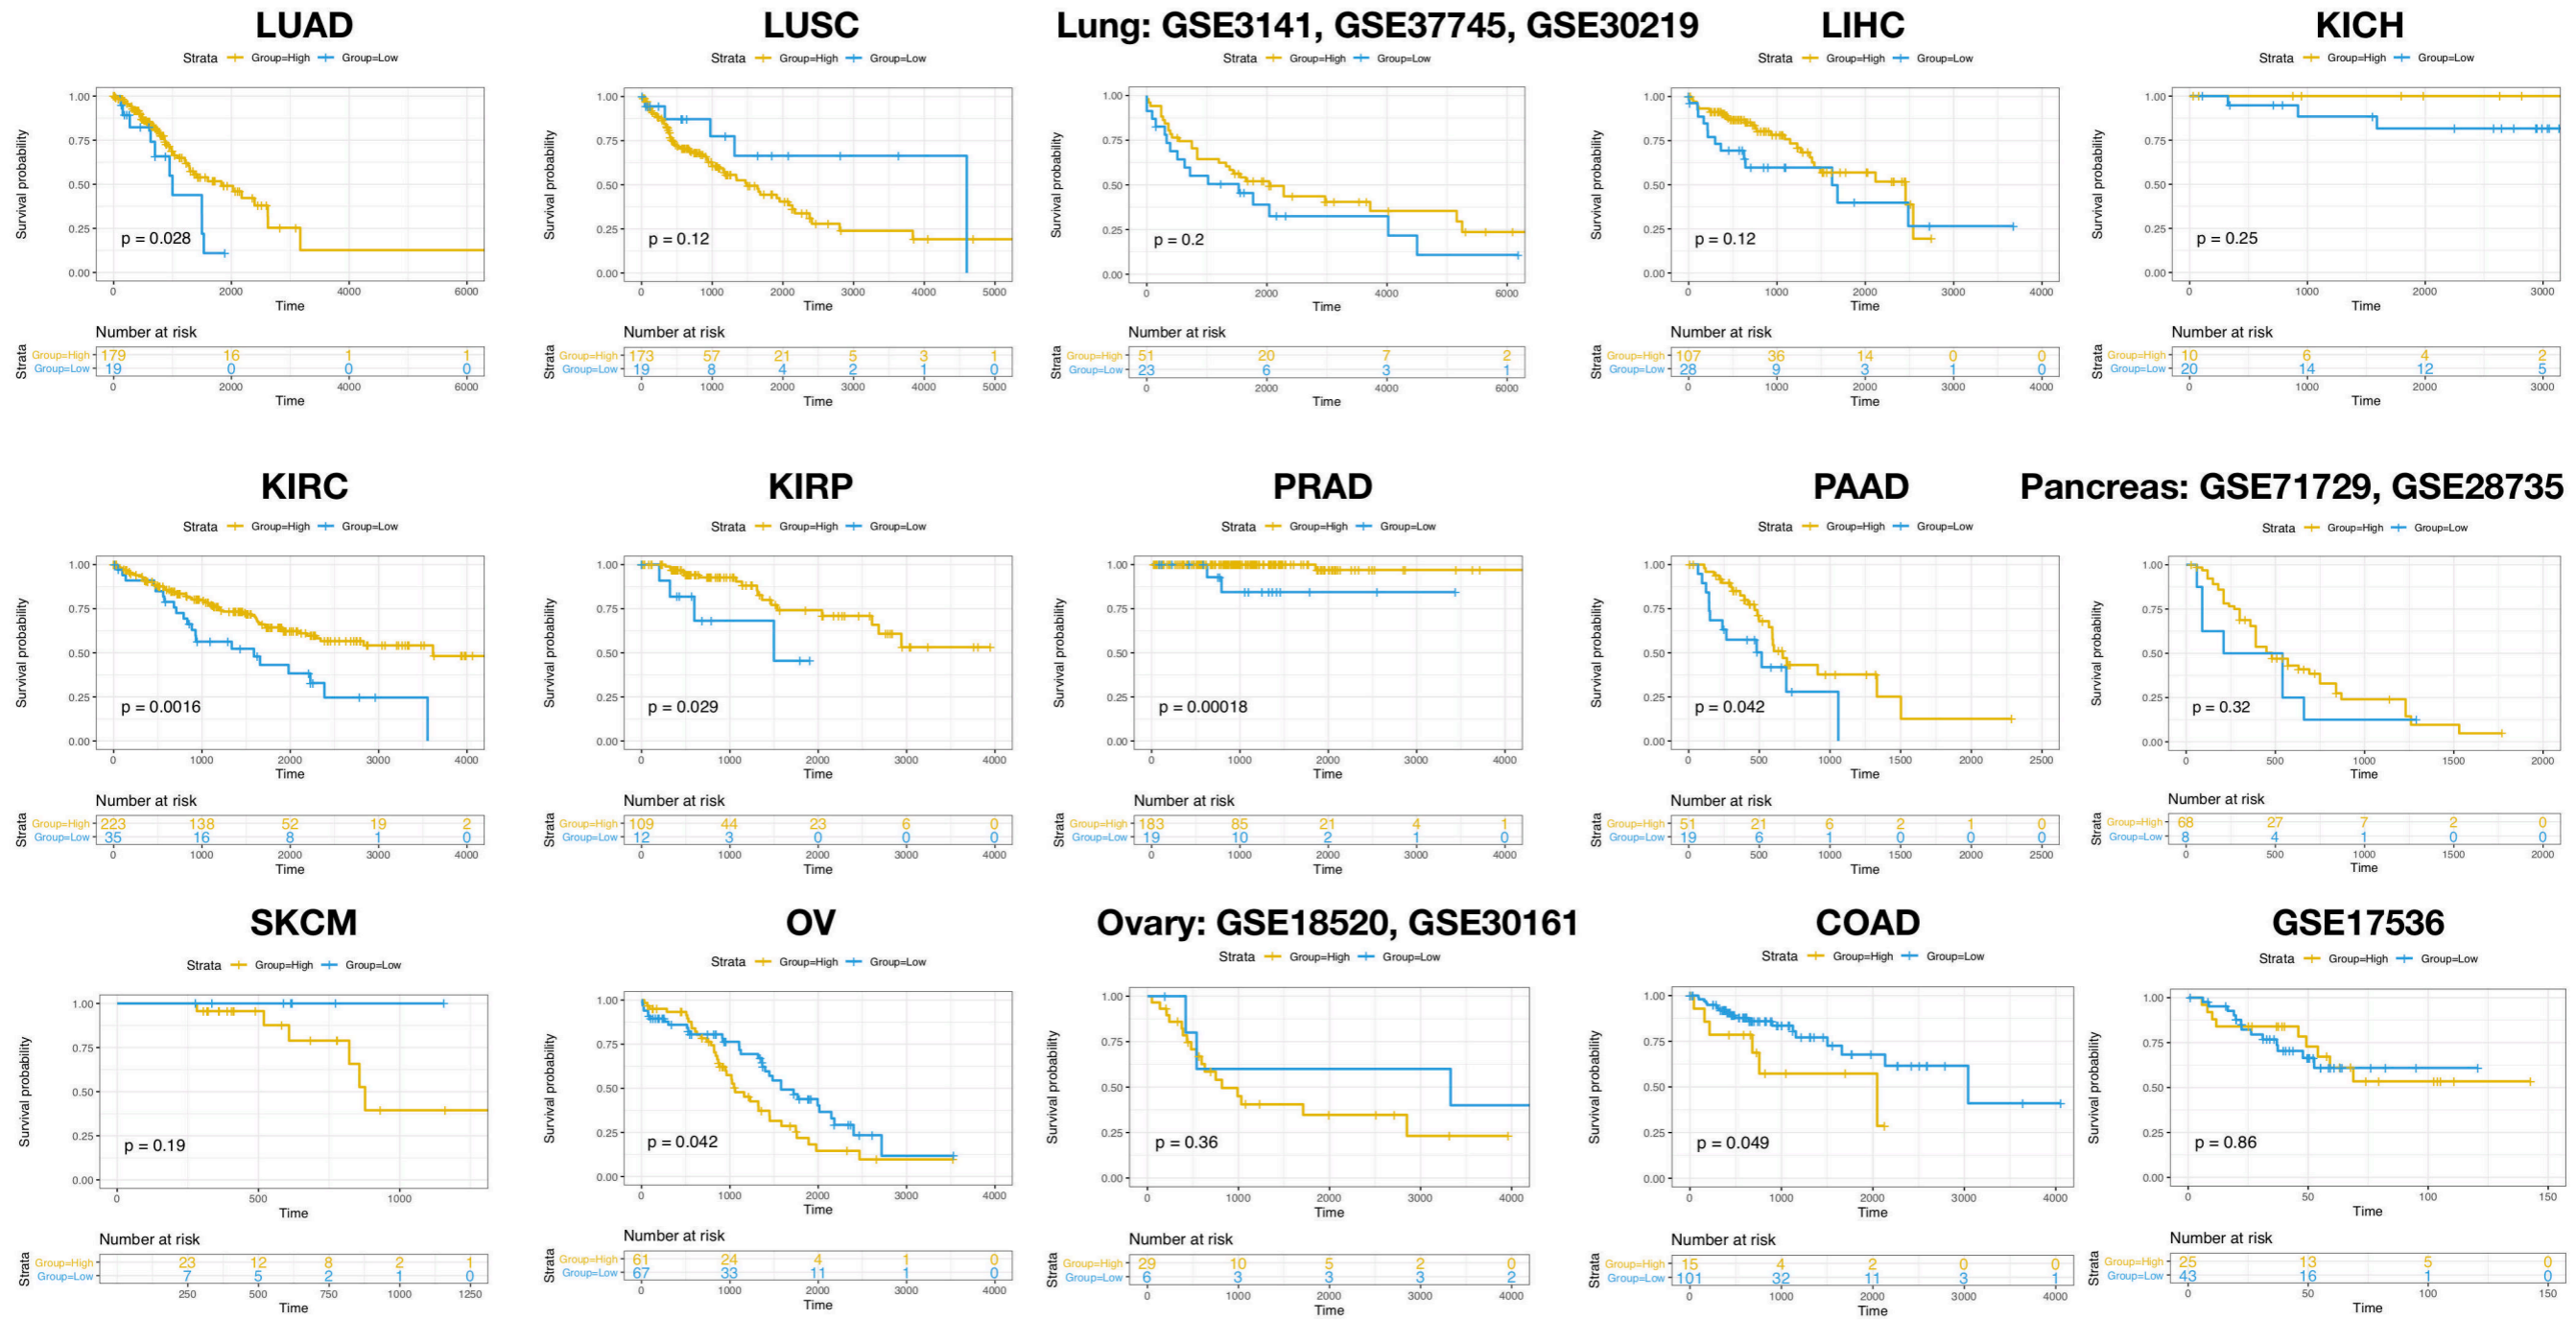

**Supplementary Figure 13: KM plots for lung, liver, kidney, prostate, pancreas and melanoma in TCGA and several independent GSE datasets**

# Supplementary Table 1

| Gene    | logFC             | AveExpr          | t                 | P.Value              | adj.P.Val          | B                  |
|---------|-------------------|------------------|-------------------|----------------------|--------------------|--------------------|
| TAP2    | -1.33635858039912 | 7.10180369178457 | -5.11273123854195 | 2.89055437531139E-06 | 0.0148879408907804 | 4.1468920630629    |
| PARP14  | -1.24968104709633 | 7.47887540925286 | -4.47535117580896 | 3.05853208850455E-05 | 0.0224818108451525 | 2.21254110804622   |
| MUC5B   | -1.23948925911655 | 7.88186030972953 | -2.38345382119777 | 0.0200122762472588   | 0.345763214669471  | -3.37630331791356  |
| GBP1    | -1.10098891036227 | 8.110312201045   | -4.83292146198769 | 8.27350604401098E-06 | 0.0153335645349003 | 3.46223052006926   |
| GBP4    | -1.09360011426999 | 5.5409463892827  | -4.24043684911711 | 7.04094578702984E-05 | 0.0391476585758859 | 1.31701594031414   |
| RNF213  | -1.08685217483235 | 9.58144205106456 | -4.45974864744149 | 3.23479292736007E-05 | 0.0224818108451525 | 2.11348967238193   |
| PARP9   | -1.04034227475808 | 6.61737476219293 | -3.23671570492533 | 0.00188608139222394  | 0.201202774300534  | -1.35269161283532  |
| OAS2    | -1.0214865963295  | 5.99474331809927 | -2.69841907169059 | 0.00882110189611531  | 0.265250375564611  | -2.58502642187831  |
| DDX60   | -1.00284567795184 | 6.59803792963941 | -2.99419713225748 | 0.00386044765501153  | 0.211937027554233  | -1.9301218249963   |
| HMGCS2  | 1.72493369206382  | 8.13507237087143 | 3.5036321728      | 0.000825699589811233 | 0.139117870283347  | -0.635191248904549 |
| DPEP1   | 1.51267783629714  | 6.62112429112653 | 3.82506076617208  | 0.00029091648498259  | 0.0929517040292831 | 0.135648011947727  |
| FCGBP   | 1.38495196886674  | 9.96849827015208 | 2.09622043278546  | 0.039868513722781    | 0.455407305085665  | -4.36422096278626  |
| AMACR   | 1.37938425012813  | 6.68174738248085 | 3.8438754480137   | 0.000273262116239093 | 0.0929517040292831 | 0.179160483378131  |
| CKB     | 1.3336970142633   | 8.35457843800319 | 4.94940567399612  | 5.35537442114403E-06 | 0.0148879408907804 | 3.82443185620885   |
| CLCA1   | 1.31572439269828  | 8.31327930865293 | 1.86973594807095  | 0.0659205369499829   | 0.523651212473593  | -4.32987512594169  |
| CES1    | 1.19643096492599  | 7.9362310078049  | 3.26258325465329  | 0.00174392060847022  | 0.197881603736621  | -1.27630600890553  |
| FBN2    | 1.12336671810833  | 6.85852022804601 | 2.8553219694421   | 0.00572841257413255  | 0.227434234390211  | -2.24598057823757  |
| EPB41L1 | 1.09824612068415  | 6.43169502363832 | 3.22313827935965  | 0.00196498660760428  | 0.201202774300534  | -1.41203185340778  |
| PTK7    | 1.04292763813684  | 7.00302726599441 | 3.03885384417029  | 0.00339206335657135  | 0.211937027554233  | -1.82660192599739  |
| ANPEP   | 1.03264175954616  | 6.74636232542563 | 2.66910230053988  | 0.00954580772926303  | 0.274653401837071  | -2.64615703549093  |
| LTBP2   | 1.03036057310203  | 7.12019301455174 | 2.98140415713139  | 0.00400530792343813  | 0.211937027554233  | -1.95774735288577  |
| TRIP6   | 1.02714214311488  | 5.64410483473386 | 4.48091858415269  | 2.99792515338385E-05 | 0.0224818108451525 | 2.06292403610948   |

**Supplementary Table 1: Differential expression analysis for proteomics in colorectal cohort in TCGA. Genes with absolute logFC > 1 are shown.**

# Supplementary Table 2

| Cancer_type    | STAT1 | PRKCB | IRF1 |
|----------------|-------|-------|------|
| BLCA (TCGA)    | 0.78  | 0.56  | 0.8  |
| Bladder (MMD)  | 0.49  | 0.56  | 0.58 |
| BRCA (TCGA)    | 0.68  | 0.82  | 0.75 |
| Breast (MMD)   | 0.71  | 0.81  | 0.76 |
| COAD (TCGA)    | 0.71  | 0.7   | 0.78 |
| Colon (MMD)    | 0.53  | 0.68  | 0.65 |
| KICH (TCGA)    | 0.15  | 0.44  | 0.5  |
| KIRC (TCGA)    | 0.67  | 0.7   | 0.8  |
| KIRP (TCGA)    | 0.36  | 0.64  | 0.64 |
| Kidney (MMD)   | 0.7   | 0.79  | 0.8  |
| LIHC (TCGA)    | 0.57  | 0.79  | 0.62 |
| Liver (MMD)    | 0.6   | 0.74  | 0.56 |
| LUAD (TCGA)    | 0.7   | 0.66  | 0.77 |
| LUSC (TCGA)    | 0.71  | 0.72  | 0.83 |
| Lung (MMD)     | 0.65  | 0.69  | 0.8  |
| SKCM (TCGA)    | 0.79  | 0.71  | 0.93 |
| Melanoma       | 0.79  | 0.59  | 0.85 |
| OV (TCGA)      | 0.54  | 0.49  | 0.56 |
| Ovary (MMD)    | 0.63  | 0.52  | 0.64 |
| PAAD (TCGA)    | 0.56  | 0.77  | 0.56 |
| Pancreas (MMD) | 0.66  | 0.84  | 0.74 |
| PRAD (TCGA)    | 0.61  | 0.5   | 0.68 |
| Prostate (MMD) | 0.34  | 0.36  | 0.41 |
| STAD (TCGA)    | 0.61  | 0.54  | 0.74 |
| Stomach (MMD)  | 0.64  | 0.67  | 0.66 |
| Overall (TCGA) | 0.6   | 0.64  | 0.71 |
| Overall (MMD)  | 0.6   | 0.67  | 0.66 |

**Supplementary Table 2: Correlation of TCIA and three RSI genes across tumours.**



# Supplementary Table 3

| Cancer types                       | RSI  |
|------------------------------------|------|
| BLCA (TCGA)                        | 0.29 |
| Bladder (GSE31684)                 | 0.13 |
| BRCA (TCGA)                        | 0.56 |
| Breast (GSE20711, GSE42568)        | 0.22 |
| LUAD (TCGA)                        | 0.15 |
| LUSC (TCGA)                        | 0.1  |
| Lung (GSE3141, GSE37745, GSE30219) | 0.25 |
| LIHC (TCGA)                        | 0.2  |
| OV (TCGA)                          | 0.28 |
| Ovary (GSE18520, GSE30161)         | 0.1  |
| COAD (TCGA)                        | 0.67 |
| Colorectum (GSE17536)              | 0.54 |
| KICH (TCGA)                        | 0.81 |
| KIRC (TCGA)                        | 0.26 |
| KIRP (TCGA)                        | 0.42 |
| PAAD (TCGA)                        | 0.26 |
| Pancreas (GSE71729, GSE28735)      | 0.58 |
| PRAD (TCGA)                        | 0.44 |
| STAD (TCGA)                        | 0.43 |
| Stomach (GSE15459, GSE34942)       | 0.14 |
| SKCM (TCGA)                        | 0.31 |

**Supplementary Table 3: Optimal cut-off RSI values for OS.**

# Supplementary Table 4

| Cancer types | N   | Median RSI |
|--------------|-----|------------|
| Bladder      | 79  | 0.27       |
| Breast       | 155 | 0.35       |
| Lung         | 42  | 0.41       |
| Liver        | 10  | 0.33       |
| Ovary        | 24  | 0.35       |
| Colon        | 20  | 0.32       |
| Kidney       | 12  | 0.22       |
| Pancreas     | 25  | 0.36       |
| Prostate     | 155 | 0.28       |
| Stomach      | 15  | 0.49       |
| Melanoma     | 44  | 0.38       |

**Supplementary Table 4: Median RSI value for metastatic tissues.**
